# Supplementary material for: Volatile Organic Compounds (VOCs) of Endophytic Fungi Growing on Extracts of the Host, Horseradish (Armoracia rusticana)
Source: MDPI journal article supplement (doi:10.3390/metabo10110451), 2020-11-08
Supplement: s1 [file s1]

**Supplementary table 3.** Headspace GC-MS performance metrics, with the authentic standards used in the study.

Abbreviations: LOQ, limit of quantitation (lowest point of calibration curve); RSD, relative standard deviation. Analytes: ACN, allyl cyanide; AITC, allyl isothiocyanate; CS<sub>2</sub>, carbon disulfide; Me<sub>2</sub>S, dimethyl sulfide; PCN, phenylpropionitrile; PEITC, phenylethyl isothiocyanate. Intraday and interday RSD was calculated from samples 0.005 µL of each authentic standard (3.35E-05 – 8.29E-05 mmol, depending on analyte), diluted with MeCN.

| Analyte           | LOQ average, mmol | Average R <sup>2</sup> | Intraday RSD | Interday RSD | Example equation        |
|-------------------|-------------------|------------------------|--------------|--------------|-------------------------|
| acetone           | 5.79E-07          | 0.9958                 | 17.80%       | 15.76%       | y = 7.74E+11 x -9.58E+5 |
| ACN               | 1.09E-06          | 0.9846                 | 13.29%       | 0.54%        | y = 1.37E+12 x -5.90E+6 |
| AITC              | 1.02E-06          | 0.9515                 | 17.10%       | 12.78%       | y = 2.35E+12 x -1.10E+7 |
| CS <sub>2</sub>   | 6.64E-06          | 0.9725                 | 8.43%        | 2.76%        | y = 5.30E+11 x -2.55E+6 |
| ethyl acetate     | 1.82E-06          | 0.9880                 | 10.74%       | 15.26%       | y = 1.13E+12 x -3.33E+6 |
| Me <sub>2</sub> S | 8.84E-06          | 0.9782                 | 18.41%       | 40.22%       | y = 4.19E+11 x -1.92E+6 |
| methyl acetate    | 2.33E-06          | 0.9921                 | 15.55%       | 32.85%       | y = 4.22E+11 x -9.88E+5 |
| methyl formate    | 2.95E-06          | 0.9933                 | 11.58%       | 62.14%       | y = 1.42E+11 x -5.87E+5 |
| PCN               | 5.96E-07          | 0.9488                 | 22.15%       | 10.04%       | y = 8.83E+12 x -3.07E+7 |
| PEITC             | 2.85E-07          | 0.9514                 | 25.05%       | 9.04%        | y = 1.24E+13 x -3.31E+7 |
