# Supplementary material for: Volatile Organic Compounds (VOCs) of Endophytic Fungi Growing on Extracts of the Host, Horseradish (Armoracia rusticana)
Source: MDPI journal article supplement (doi:10.3390/metabo10110451), 2020-11-08
Supplement: s1 [file s1]

---

Strain: **E8**

Identified genus: *Fusarium*

ITS sequence:

CCTACTGGGAATCGAGGATGACAGCGGAGGGACATTACCGAGTTTACAACCTCCCAAACCCCTGTGAACATA  
CCACTTGTTCCTCGGCGGATCAGCCCGCTCCCGGTAAAACGGGACGGCCCGCCAGAGGACCCCTAAACTC  
TGTTTCTATATGTAACCTCTGAGTAAAACCATAAATAAATCAAAACTTTCAACAACGGATCTCTTGGTTCTG  
GCATCGATGAAGAACGCAGCAAAATGCGATAAGTAATGTGAATTGCAGAATTCAGTGAATCATCGAATCTT  
TGAACGCACATTGCGCCCGCCAGTATTCTGGCGGGCATGCCTGTTTCGAGCGTCATTTC AACCTCAAGCACA  
GCTTGGTGTGGGACTCGCGTTAATTCGCGTTCCTCAAATTGATTGGCGGTCACGTCGAGCTTCCATAGCGT  
AGTAGTAAAACCCCTCGTTACTGGTAATCGTCGCGGCCACGCCGTTAAACCCCAACTTCTGAATGTTGACCTC  
GGATCAGGTAGGAATACCCGCTGAACTTAAGCATATCAATAAGCGGGAGGAACGAAAGATTCATTATAATT  
CTTGT

BLAST query:

>Fusarium oxysporum strain 4099 internal transcribed spacer 1, partial sequence; 5.8S ribosomal RNA gene and internal transcribed spacer 2, complete sequence; and large subunit ribosomal RNA gene, partial sequence

Sequence ID: MN817702.1 Length: 540

Range 1: 1 to 540 Score:981 bits(531), Expect:0.0, Identities:537/540(99%), Gaps:0/540(0%), Strand: Plus/Plus

---

Strain: **E9**

Identified genus: *Fusarium*

ITS sequence:

GTCTTGGGGCCCCGGCTGGGACAGCGGAGGGACATTACCGAGTTTACAACCTCCCAAACCCCTGTGAACATA  
CCACTTGTTCCTCGGCGGATCAGCCCGCTCCCGGTAAAACGGGACGGCCCGCCAGAGGACCCCTAAACTC  
TGTTTCTATATGTAACCTCTGAGTAAAACCATAAATAAATCAAAACTTTCAACAACGGATCTCTTGGTTCTG  
GCATCGATGAAGAACGCAGCAAAATGCGATAAGTAATGTGAATTGCAGAATTCAGTGAATCATCGAATCTT  
TGAACGCACATTGCGCCCGCCAGTATTCTGGCGGGCATGCCTGTTTCGAGCGTCATTTC AACCTCAAGCACA  
GCTTGGTGTGGGACTCGCGTTAATTCGCGTTCCTCAAATTGATTGGCGGTCACGTCGAGCTTCCATAGCGT  
AGTAGTAAAACCCCTCGTTACTGGTAATCGTCGCGGCCACGCCGTTAAACCCCAACTTCTGAATGTTGACCTC  
GGATCAGGTAGGAATACCCGCTGAACTTAAGCATATCAATAAGCGGAGGAAGATAAAACCCCAAAAAAAAA  
G

BLAST query:

>Fusarium oxysporum isolate Fox64 18S ribosomal RNA gene, partial sequence; internal transcribed spacer 1, 5.8S ribosomal RNA gene, and internal transcribed spacer 2, complete sequence; and 28S ribosomal RNA gene, partial sequence

Sequence ID: KJ562370.1 Length: 555

Range 1: 14 to 555 Score:983 bits(532), Expect:0.0, Identities:539/542(99%), Gaps:2/542(0%), Strand: Plus/Plus

---

Strain: **E10**

Identified genus: *Fusarium*

ITS sequence:

TACTAGGGCAATGCGTGGGGGAACAGCGGAGGGACATTACCGAGTTTACAACCTCCCAAACCCCTGTGAAC  
ATACCACTTGTTGCCTCGGCGGATCAGCCCGCTCCCGGTAAAACGGGACGGCCCGCCAGAGGACCCCTAAA  
CTCTGTTTCTATATGTAACCTCTGAGTAAAACCATAAATAAATCAAAACTTTCAACAACGGATCTCTTGGTT  
CTGGCATCGATGAAGAACGCAGCAAAATGCGATAAGTAATGTGAATTGCAGAATTCAGTGAATCATCGAAT  
CTTTGAACGCACATTGCGCCCGCCAGTATTCTGGCGGGCATGCCTGTTTCGAGCGTCATTTC AACCTCAAGC  
ACAGCTTGGTGTGGGACTCGCGTTAATTCGCGTTCCTCAAATTGATTGGCGGTCACGTCGAGCTTCCATAG  
CGTAGTAGTAAAAACCCCTCGTTACTGGTAATCGTCGCGGCCACGCCGTTAAACCCCAACTTCTGAATGTTGA  
CCTCGGATCAGGTAGGAAATACCC

BLAST query:

>Fusarium oxysporum isolate P45\_ITS\_G03\_010.ab1 internal transcribed spacer 1, partial sequence; 5.8S ribosomal RNA gene and internal transcribed spacer 2, complete sequence; and large subunit ribosomal RNA gene, partial sequence

Sequence ID: MT032691.1 Length: 534

Range 1: 6 to 514

Score:913 bits(494), Expect:0.0, Identities:506/511(99%), Gaps:3/511(0%), Strand: Plus/Plus

---

---

Strain: **E11**

Identified genus: *Plectosphaerella*

ITS sequence:

ACAAAAACCAACTGGTTTTGTGACAGCGGAGGGATCATTACTGAGGTACTACACTCTCTACCCTTTGTGAAC  
TATTATACCTGTTGCTTCGGCGGCGCCCGCGAGGGTGCCCGCCGGTCTCATCAGAATCTCTGTTTTCGAACC  
CGACGATACTTCTGAGTGTTCTTAGCGAACTGTCAAAACTTTTAACAACGGATCTCTTGGCTCCAGCATCGA  
TGAAGAACGCAGCGAAACGCGATATGTAATGTGAATTGCAGAATTCAGTGAATCATCGAATCTTTGAACGC  
ACATGGCGCCTTCCAGTATCCTGGGAGGCATGCCTGTCCGAGCGTCGTTTCAACCCTCGAGCCCCCGTGGCC  
CGGCG

BLAST query:

>Plectosphaerella cucumerina isolate I652 ITS1\_F07\_027.ab1 internal transcribed spacer 1, partial sequence; 5.8S ribosomal RNA gene and internal transcribed spacer 2, complete sequence; and large subunit ribosomal RNA gene, partial sequence

Sequence ID: MT032542.1 Length: 519

Range 1: 1 to 345

Score:627 bits(339), Expect:2e-175, Identities:344/346(99%), Gaps:2/346(0%), Strand: Plus/Plus

---

Strain: **E12**

Identified genus: *Plectosphaerella*

ITS sequence:

AATGTYACGTTGGTGTACCAGCGGAGGTACATTACTGAGTACTACACTCTCTACCCTTTGTGAACATTATACC  
TGTTGCTTCGGCGGCGCCCGCGAGGGTGCCCGCCGGTCTCATCAGAATCTCTGTTTTCGAACCCGACGATAC  
TTCTGAGTGTTCTTAGCGAACTGTCAAAACTTTTAACAACGGATCTCTTGGCTCCAGCATCGATGAAGAACG  
CAGCGAAACGCGATATGTAATGTGAATTGCAGAATTCAGTGAATCATCGAATCTTTGAACGCACATGGCGC  
CTTCCAGTATCCTGGGAGGCATGCCTGTCCGAGCGTCGTTTCAACCCTCGAGCCCCCGTGGCCCCGGCGTTGG  
GGATCTGCCACGGCAGGCCCCCTAAACCAGTGGCGGACCCGAAGGCCCTCTCTTTGCGCAGTAGCATCAG  
CCTCGCATTTGGGATCCCTCGGCGTCTGCCTCTAAACCCCCACAAGTCCGCTCCGGCGGCACCAAGGTTG  
ACCTCGGATCAGGTAGGAATACCCGCTGAACTTAAGCATATCAWTAAGCGGAGGGAA

BLAST query:

>Plectosphaerella cucumerina strain NQ5GI3 small subunit ribosomal RNA gene, partial sequence; internal transcribed spacer 1, 5.8S ribosomal RNA gene, and internal transcribed spacer 2, complete sequence; and large subunit ribosomal RNA gene, partial sequence

Sequence ID: MK183802.1 Length: 597

Range 1: 45 to 595

Score:990 bits(536), Expect:0.0, Identities:546/551(99%), Gaps:1/551(0%), Strand: Plus/Plus

---

Strain: **E13**

Identified genus: *Pyrenochaeta*

ITS sequence:

GGGGACAGTRCGTTAGTGACCTGCGGAGGTACATTATTGTATAACGGGGGCGGCGAGGGATTGCGCACTT  
CGGTGCGCCTTTCTTCCCCGCCCTGTCTGATACTACCCATGTCTTTTGCGTACCAATTGTTTCCTCGGTGGGCT  
TGCCCGCCGGTTGGACACTATAAAACCTTTTGTAATTGCAGTCAGCGTCAGAAAAACATAATAATTACAAC  
TTCAACAACGGATCTCTTGGTTCTGGCATCGATGAAGAACGCAGCGAAATGCGATAAGTAGTGTAATTGC  
AGAATTCAGTGAATCATCGAATCTTTGAACGCACATTGCGCCCCCTTGGTATTCCATGGGGCATGCCTGTTCG  
AGCGTCATTTGTACCCTCAAGCTCTGCTTGGTGTTGGGTGTTTGTCCCGCTTTGCGCGTGGACTCGCCTTAAA  
GCAATTGGCAGCCGGCAATCTGGTTATAGAGCGCAGCACATTTTGCGCTTCTTGCCATGGATGTGGGCATCC  
ATCAAAGTACATTTTTTTTGTCTTTGACCTCGGGATCAGGTAGGGATAACCCGCTGAAACTTAAGCATATCA  
AATAAGCCRGAGGAA

BLAST query:

>Pyrenochaeta sp. strain Py004 small subunit ribosomal RNA gene, partial sequence; internal transcribed spacer 1, 5.8S ribosomal RNA gene, and internal transcribed spacer 2, complete sequence; and large subunit ribosomal RNA gene, partial sequence

Sequence ID: MN537136.1 Length: 608

Range 1: 34 to 607 Score:996 bits(539), Expect:0.0, Identities:568/580(98%), Gaps:9/580(1%), Strand: Plus/Plus

---

Range 1: 19 to 395 Score:649 bits(351), Expect:0.0, Identities:368/378(97%), Gaps:4/378(1%), Strand: Plus/Plus

---

Strain: **E16**

Identified genus: *Cadophora*

ITS sequence:

ARTKKGACAATTCAGTTRGTGACCTGCGGGAGGTACATTACTAGAGCAAAGGATAGACAGCGCCCGTGGAG  
CTCGCTCCCGGGGCTACCCTACTCCGGTAGGGTTTAGAGTCGTCGAGCCTCTCGAAGAAGCTCGGTCTGAA  
CTCCACCCTTGAATAAACTACCTTTGTTGCTTTGGCGGGCCGCCTCGTGCCAGCGGCTTCGGCTGTTGAGTG  
CCCGCCAGAGGACCACAACCTCTTGTCTTTAGTGATGTCTGAGTACTATATAATAGTTAAACTTTCAACAACG  
GATCTCTTGTTCTGGCATCGATGAAGAACGCAGCGAAATGCGATAAGTAATGTGAATTGCAGAATTCRGT  
GAATCATCGAATCTTTGAACGCACATTGCGCCCTCTGGTATTCCGGGGGGCATGCCTGTTTCGAGCGTCATTA  
TAACCACTCAAGCTCTCGCTTGGTATTTGGGGGTTCGCGGWTTTCGCGGYCCCTAAAAATCAATKGGRRGGT  
GCCCTGTWCGGCTCTRCRSCGTAATAATAMATCCTTCGSSKTTTGGATTCCGGGTAAGGTAATAAWTTWG  
GCSAAAAAACCCTTAATTGTTTTTAAAAAGGWTGGAACCTTCGGGAAAWAAGGTAAAAAATAARCCAA  
GSTGAAAACCTTTAARSMATAATWAAWAAAAAAMGGARAGAGGAAAAGARARRAGGAAAGAAGAKGTTA  
AAAAAAGAAAAAAGAAAAAAGAAAAAAGAAAAAAGAAAAAAGAAAAAAGAAAAAAGAAAAAAG  
GAAAAAAGAAAAAAGAAAAAAGAAAAAAGAAAAAAGAAAAAAGAAAAAAGAAAAAAGAAAAAAG  
AWAAGAGAAAGAAAAAAGAAAAAARGKAAAAAAGAAAAAAGAAAAAAGAAAAAAGAAAAAAG  
GAAAAAGAGGAGAAAAAAGAAAAAAGAAAAAAGAAAAAAGAAAAAAGAAAAAAGAAAAAAGAAAAA  
WAAAAAAGAAAAAAGAAAAAAGAAAAAAGAAAAAAGAAAAAAGAAAAAAGAAAAAAGAAAAAAG

BLAST query:

>Cadophora orchidicola voucher JS242014 18S ribosomal RNA gene, partial sequence; internal transcribed spacer 1, 5.8S ribosomal RNA gene, and internal transcribed spacer 2, complete sequence; and 28S ribosomal RNA gene, partial sequence

Sequence ID: KY271867.1 Length: 630

Range 1: 23 to 528 Score:833 bits(451), Expect:0.0, Identities:493/514(96%), Gaps:9/514(1%), Strand: Plus/Plus

---

Strain: **E17**

Identified genus: *Colletotrichum*

ITS sequence:

AGAARCARWYCGTTGGTGACCAGCGGAGGGTACATTACTGAGTACTACACTCTCTACCCCTTTGTGAACCTAT  
TATACCTGTTGCTTCGGCGGGCGCCCGCGAGGGTGCCCGCCGGTCTCATCAGAATCTCTGTTTTCGAACCCGA  
CGATACTTCTGAGTGTTCTTAGCGAACTGTCAAACTTTTAACAACGGATCTCTTGGCTCCAGCATCGATGA  
AGAACGCAGCGAAACGCGATATGTAATGTGAATTGCAGAATTCAGTGAATCATCGAATCTTTGAACGCACA  
TGGCGCCTTCCAGTATCCTGGGAGGCATGCCTGTCCGAGCGTCGTTTCAACCCTCGAGCCCCCGTGGCCCCG  
CGTTGGGGGATCTGCCCCACGGCAGGCCCTAAACCAGTGGCGGACCCGAAGGGCCCTTCTCCTTTGCGCA  
AGWAAAMAAYAARCCTACGCATTGAGGWTGCCRTCGGGGAGAACCATGCCCTCTWAAGACCGCRCCCAC  
AAAGGGAWAAGTTACRAGRAGAAWMCCRAAGGKTTAGAYWCTWCMGRATCMAAGKTA

BLAST query:

>Colletotrichum pisi isolate OTU560 internal transcribed spacer 1, partial sequence; 5.8S ribosomal RNA gene and internal transcribed spacer 2, complete sequence; and 28S ribosomal RNA gene, partial sequence

Sequence ID: GU934514.1 Length: 563

Range 1: 12 to 425 Score:741 bits(401), Expect:0.0, Identities:414/419(99%), Gaps:5/419(1%), Strand: Plus/Plus

---

---

Strain: **S1**

Identified genus: *Notophoma*

ITS sequence:

CCTATAGGCTTTTCGTAGGTGACTGCGGAGGACATTACCTAGAGTTGCGGGCTTTGCCTGCCATCTCTTACCCA  
TGTCTTTTGAGTACCTTCGTTTCCTCGGCGGGTCCGCCCCGCCGATTGGACAAAACCTTAAACCCTTTGTAATTG  
AAATCAGCGTCTGAAAAAACTTAATAGTTACAACCTTTCAACAACGGATCTCTTGTTCTGGCATCGATGAA  
GAACGCAGCGAAATGCGATAAGTAGTGTGAATTGCAGAATTCAGTGAATCATCGAATCTTTGAACGCACAT  
TGCGCCCCCTTGGTATTCCATGGGGCATGCCTGTTTCGAGCGTCATTTGTACCTTCAAGCTTTGCTTGGTGTGG  
GTGTTTGTCTCGCCTCTGCGCGCAGACTCGCCTCAAAAACGATTGGCAGCCGGCGTATTGATTTCGGAGCGCA  
GTACATCTCGCGCTTTGTAGTCTCAACGACGACGTCGAAGAGAGTACTTTTTTCACTCTTGACCTCGGATCAG  
GTAGGGATACCCGCTGAACCTTAAGCATATCAATTAAGCGGAGAGAATCCCCTTTTTTTTTTCAAAAAATAG

BLAST query:

>Nothophoma quercina isolate R49 small subunit ribosomal RNA gene, partial sequence; internal transcribed spacer 1, 5.8S ribosomal RNA gene, and internal transcribed spacer 2, complete sequence; and large subunit ribosomal RNA gene, partial sequence

Sequence ID: MT420644.1 Length: 542

Range 1: 3 to 540 Score:948 bits(513), Expect:0.0, Identities:532/540(99%), Gaps:6/540(1%), Strand: Plus/Plus

---

Strain: **S2**

Identified genus: *Penicillium*

ITS sequence:

CMWWMCAGKGRGGYCTCTGGGTACCTCCACCCGYWTTATCGACCTTMTTGCTTCGGTGGTTCGMCTCT  
CCGCCGGCGGGTGGCTATTCATGATGCTTTRATTACRACATCCCTTATTAATTCACACCCACCCCCCCTAG  
CACKATACTTTTTTAATTTCTTCCCCCTCACTCAAAAATTACCATAACAACTCAAACACCTCCCCCTCCCCCT  
CCCTTCCCTKCCTTTCCCCCCCCCACTTATCTTAAACATTAAACAACCAKCCCACACCAACCCCCCKCCC  
ATCCRCCCCCCCCCTCKKAMARRTAATTTCTTAATMTTWATYTARCATAAARMAAASMCGATAAAAAACA  
CAAAATAATAAATTTAAAAAATTSTTAATAAAAAAAAAGKACCCCCCGCCGKTCACACCTCCTAAKTAA  
AATAACWCCCCTCACCCCTCCTYCCATMCTTTTCTTSATTTYTTCTCTCCCTCCTGCCCCGMSAGACGCYCA  
TTCCCAGGAWCTTACGAWTGAGGGCCTCKGGGTCCTCCACGCGTTTATGWACTGTTGCTCGGGGGCGCCC  
GGYCGCGGGGGGCTCGCCCCGGCCCCGCCGCAAAACATGAAGCGCCGAGAMGCGTCTGGCAWTACTAAA  
AGTAAACTTCACAGGTACCTGGTTCGCTCATCAWAACCGSAATGSYTARCAKGTGAATGCRAATCGKGAAC  
CMGTCTTGAAGCCMTGATTCCSSYATCGGGGGGKAGCGGRAAATTKSCTCTYCTSTKMGRGGGGWWCCWG  
ACCATAAAGSCAGCSCWCCTAAATKTGAGWTCAACMTCTGTCRCGTTGTAKKTCACCTTTTYYSTGWGTCY  
YGTSTGKWSIGWCCGGACTTTMATCAAKGGGGGAATTCACCTSTSTGTTTCATCTGTGCR

BLAST query:

>Penicillium lanosum strain 2# 10-2 No.110411-1 18S ribosomal RNA gene, partial sequence; internal transcribed spacer 1, 5.8S ribosomal RNA gene, and internal transcribed spacer 2, complete sequence; and 28S ribosomal RNA gene, partial sequence

Sequence ID: JX536388.1 Length: 525

Range 1: 12 to 117 Score:73.4 bits(80), Expect:2e-08, Identities:86/107(80%), Gaps:12/107(11%), Strand: Plus/Plus

---

---

Strain: **S3**

Identified genus: *Curvularia*

ITS sequence:

AAAACCTGTTTCGTAAGTGACCTMGC GGAGGGTACATTACACAATACAATATGAAGGCCCGTAACACGGCTGG  
ATTATTTTATTACCCTTGTCTTTTGCGCACTTGTGTTCCTGGGCGGGTTTCGCCCCGCCACCAGGACCACACC  
ATAAACCTTTTTTATGCAGTTGCAATCAGCGTCAGTACAACAAATGTAAATCATTTACAACCTTTCAACAACG  
GATCTCTTGGTTCTGGCATCGATGAAGAACGCAGCGAAATGCGATACGTAGTGTGAATTGCAGAAATTCAGT  
GAATCATCGAATCTTTGAACGCACATTGCGCCCTTTGGTATTCCAAAGGGCATGCCTGTTTCGAGCGTCATTT  
GTACCCTCAAGCTTTGCTTGGTGTGGGCGTTTTTTTGTCTTTGGTTATGCCAAAGACTCGCCTTAAAACGAT  
TGGCAGCCGGCCTCCTGGTTTCGCAGCGCAGCACATTTTTCGCTTGAATCAGCAATAGAGGGCGGCACT  
CCATCAAGACACTTTTTTTCACGTTTGACCTCGGATCAGGTAGGGATACCCGCTGAACCTTAAGCATATCAAT  
AAGCGGAGG

BLAST query:

>Curvularia inaequalis strain 4Lss1 internal transcribed spacer 1, partial sequence; 5.8S ribosomal RNA gene, complete sequence; and internal transcribed spacer 2, partial sequence

Sequence ID: KC897660.1 Length: 577

Range 1: 1 to 576 Score:1037 bits(561), Expect:0.0, Identities:572/577(99%), Gaps:2/577(0%), Strand: Plus/Plus

---

Strain: **S4**

Identified genus: *Curvularia*

ITS sequence:

ATWTWACAGTTCGTTAGTGTAMCTGCGGAGGTACATTACACAATACAATATGAAGGCCCGTGACACGGCTG  
GATTATTTTATTACCCTTGTCTTTTGCGCACTTGTGTTCCTGGGCGGKTTTCGCCCCGCCACCAGGACCRC  
CCATAAACCTTTTTTATGCAGTTGCAATCAGCGTCAGTACAACAAATGTAAATCATTTACAACCTTTCAACA  
CGGATCTCTTGGTTCTGGCATCGATGAAGAACGCAKCGAAATGCGATACGTASTGTGAATTGCAGAAATTCAG  
TGAATCATCSAATCTTTGAACGSACATTGCGCCCTTTGGTATTCCAAAGGGCATGCCTGTTTCGAGCGKCATT  
GTACCCTCAAGCTTTGCTTGGTGTGGGCGTTTTTTTGTCTTTGGTTATGCCAAAGACTCGCCTTAAAACGAT  
TGGCAGCCGGCCTCCTGGTTTCGCAGCGCAGCACATTTTTCGCTTGAATCAGCAATAKAGGGCGGCACT  
CCATCAAGACACTTTTTTTCACGTTTGACCTCGGATCAGGTAGGGATACCCGCTGAACCTTAAGCATATCATT  
AGCGGAGGAA

BLAST query:

>Curvularia inaequalis 18S ribosomal RNA gene, partial sequence; internal transcribed spacer 1, 5.8S ribosomal RNA gene and internal transcribed spacer 2, complete sequence; and 28S ribosomal RNA gene, partial sequence

Sequence ID: AF313409.1 Length: 605

Range 1: 33 to 605 Score:992 bits(537), Expect:0.0, Identities:558/573(97%), Gaps:1/573(0%), Strand: Plus/Plus

---

Strain: **S5**

Identified genus: *Curvularia*

ITS sequence:

AGCATTCGTAAGTGTACCTGCGGAGGTACATTACCGAKCGAGATTCTCTGATTCACCTCCCWCCCGTGTTTAT  
TGTCCCTTGTGCTTCSGCGCTTGKGTCCCGGGCGGGGGTTCGCCCCGCGMCCCCGACCACCCRTCCGCCT  
TTTTTACTTGTGTGCTGCAGCGTCTTGACAWCTGAGTMAATCATTACTATTTCACAACCGATCTCTTGKYTC  
TGGSWTCSAKGAWSAAYGAAGARMAMTGGAWAYGYAATGYGAATTGYRAAWTTCAGAGAAYCATCRAAY  
CTTTGAACKYWCAATTGCGCCCTGTGSCATTCGRAAKGSCATGCCTGTTCSAGCGYCATTTGTACCCTGCAAGC  
CYTTGCTTGGTGTGGGCGTGTTTTTTGTCTKTCSGYTATGCCCAAAGGACTMSCCTTCCAACRAKTGGCAG  
CCGGMCTCCTGGYGKSCASCRCAGCACRTTTTTTGYGCTTGAATCATSAATAGASGGCGGCACTTCRTCAA  
KACACTTTTTAYTTCWYGYTGTACCTCRSCATCGAGRTCAGGGTATACCMTGCTGCAACTKTAAGTCATAT  
CAWATAMAGCTGGAASSGAAAGGAA

BLAST query:

>Curvularia inaequalis isolate F2-3-3 internal transcribed spacer 1, partial sequence; 5.8S ribosomal RNA gene and internal transcribed spacer 2, complete sequence; and 28S ribosomal RNA gene, partial sequence

Sequence ID: KX349453.1 Length: 559

Range 1: 59 to 558

Score:380 bits(421), Expect:7e-101, Identities:385/519(74%), Gaps:24/519(4%), Strand: Plus/Plus

---

---

Strain: **S6**

Identified genus: *Aspergillus*

$\alpha$ -actin sequence:

GGGRRWCCTYSRRMWGTTTTTCGTAAGTCCAACCAAAATCCCCCACAAGATCCCTCACAAKGGCAACCCTT  
CCCCTCCTCCKGGGAAGTCATTCCCACCAACCCTTGCGTCAGCCCCCTCGGCCAAGCTGGGGTTGGTCGGAG  
AATTTGCCACTTTGGACGTCGAGTGGAATTGACCATCAAAAATCCAAATACTGACCAAAAATCCATAGCCTC  
CATTGTCTGGTCTGTCCTCCCGTCACCAKGGGWAAATATCCCCTTGTTCTCTCACTGTTTCTCGGCCTTGACCTGGC  
GTCGTTGCTCTATGCGCTGTTTAAACGCATCGCAAGCATTCTTGCAAAATTGTCTTCCARAAAATAACGC  
AATGCTCCAGTATCAKGATKGGTATGGGCCAGAAGAAGCTCGWAAACTTTTKGTTCTGTYMCTMTTTAAATA  
TCTMCTMTTTAAACYTTTTYATAATTGCTTATATTCTATAAAATAKATAAATAAKCCAATCAAGTCAKMAAA  
AAAAAMMAATAWATAATAATTTYTTTTTTTTTYTTGTTAKTTATTATACTTATTTTTATTTATTTMAWACATTMA  
AACTWATTYMATTTTTTTKATTTTTWTWTWTWATCWAAATTAATACTCCATCAACCATMTTATYTAATT  
ATTKATATATTTAKTTTWGTTTTTAAATCCTATATTTTCCTTCRTTSTTTTTYTYTTKRTSTGTTSTCGTCTATYA  
YTCCTCATTCTAWTTATAACTCTTCTTTCCTTCTTTTTTYTTTTTTTAAATTCACKATTKWTWTYARATCAR  
AYMCATATTTTCAMACTAATATATTCTTTCATTCTRTTTTTCAKTTTCTTTYCTCATTCTCAKTGATTTTCCATC  
TSMAATTSTCTCTTTGCGTGSCTTCCCTTGTTTATCCTSCACTTCTCSTKTGTTATTTCTTTTTTCTCTCYKTC  
TSTGTSTACACAATAGRTGATGTAARTRKCTTTATTTCACTCCTCCASAATCAWAACGTTCTCAAMATTAKTAT  
TCAGAATCTTCACAKSTCGTSKT

BLAST query:

>Aspergillus udagawae strain CBS DTO\_283-D3 actin gene, partial cds

Sequence ID: KY808536.1 Length: 705

Range 1: 493 to 539 Score:80.5 bits(43), Expect:2e-10, Identities:45/47(96%), Gaps:0/47(0%), Strand: Plus/Plus

---

Strain: **S7**

Identified genus: *Fusarium*

ITS sequence:

GAACGACGGACTCGTGTTGTGACAGCGGAGGACATTACCGAGTTTACACTCCCCAAACCCCTGTGAACATACC  
ACTTGTTGCCTCGGCGGATCAGCCCGCTCCCGGTAAAACGGGACGGCCCGCCAGAGGACCCCTAAACTCTG  
TTTCTATATGTAACCTCTGAGTAAAACCATAAAATAAATCAAAACTTTCAACAACGGATCTCTTGTTCTGGC  
ATCGATGAAGAACGCAGCAAAATGCGATAAGTAATGTGAATTGCAGAATTCAGTGAATCATCGAATCTTTG  
AACGCACATTGCGCCCGCCAGTATTCTGGCGGGCATGCCTGTTTCGAGCGTCATTTC AACCCCTCAAGCACAG  
CTTGTTGTTGGGACTCGCGTTAATTCGCGTTCCTCAAATTGATTGGCGGTCACGTCGAGCTTCCATAGCGTA  
GTAGTAAAACCCCTCGTTACTGGTAATCGTCGCGGCCACGCCGTTAAACCCCAACTTCTGAATGTTGACCTCG  
GATCAGGTAGGAATACCCGCTGAACTTAAGCATATCATAAGCGGAGGAATCCCCCAATACTTCATTTATTT  
TTT

BLAST query:

>Fusarium oxysporum isolate Fox64 18S ribosomal RNA gene, partial sequence; internal transcribed spacer 1,  
5.8S ribosomal RNA gene, and internal transcribed spacer 2, complete sequence; and 28S ribosomal RNA gene,  
partial sequence

Sequence ID: KJ562370.1 Length: 555

Range 1: 13 to 555 Score:966 bits(523), Expect:0.0, Identities:538/544(99%), Gaps:6/544(1%), Strand: Plus/Plus

---

---

Strain: **S8**

Identified genus: *Fusarium*

ITS sequence:

ATTCCCTACCTGGATCCAAGGGTCACATTCAGAAAGTTGGGGTTTACGGCGTGGCCGCGACGATTACCAGTAA  
CGAGGGTTTTACTACTACGCTATGGAAGCTCGACGTGACCGCCAATCAATTTGGGGAACGCGATTTGACTCG  
CGAGTCCCAACACCAAGCTGGGCTTGAGGGTTGAAATGACGCTCGAACAGGCATGCCCCGCCAGAATACTG  
GCGGGCGCAATGTGCGTTCAAAGATTCATGATTCCTGAATTCTGCAATTCACATTACTTATCGCATTTTGCT  
GCGTTCTTCATCGATGCCAGAACCAAGAGATCCGTTGTTGAAAGTTTTGATTTATTTATGGTTTACTCAGAA  
GTTACATATAGAAACAGAGTTTAGGGGTCCTCTGGCGGGCCGTCCCCGGGTACGG

BLAST query:

>Fusarium verticillioides isolate FM2 small subunit ribosomal RNA gene, partial sequence; internal transcribed spacer 1, 5.8S ribosomal RNA gene, and internal transcribed spacer 2, complete sequence; and large subunit ribosomal RNA gene, partial sequence

Sequence ID: MK790042.1 Length: 679

Range 1: 259 to 667 Score:717 bits(388), Expect:0.0, Identities:404/411(98%), Gaps:4/411(0%), Strand: Plus/Minus

---

Strain: **S9**

Identified genus: *Penicillium*

ITS sequence:

GACRGTCTKAAGGTGACCTGCGGAGGWCTTACCGAGCGAGRITCCTCTGARKTCMACCYTCCMMCCCCG  
KTGKTTTWTGTCGAMCYTGTTGCTTCGGCGGGCCCCGCTCACGGCCGCCGGGGGGCTTCTGCCCTCTGGCCC  
GCGCCCGCCGAAGACACCWTTGAMCGCTGWCTGAARATTGCAGTCTGAGCTATTAGCTAAATAAGTTAAA  
ACTTTCAGCAACGGATCTCTKGGTCCGGCATCRATGAAAAACGC

BLAST query:

>Penicillium restrictum strain GZU-BCEC393-3 18S ribosomal RNA gene, partial sequence; internal transcribed spacer 1, 5.8S ribosomal RNA gene, and internal transcribed spacer 2, complete sequence; and 28S ribosomal RNA gene, partial sequence

Sequence ID: GU565105.1 Length: 573

Range 1: 1 to 239 Score:311 bits(168), Expect:1e-80, Identities:215/244(88%), Gaps:7/244(2%), Strand: Plus/Plus

---

Strain: **S10**

Identified genus: *Fusarium*

ITS sequence:

AACAAGTTCGTTGGTGACCAGCGGAGGGTACATTACCGAGTTTACAACCTCCCAAACCCCTGTGAACATACCT  
ATACGTTGCCTCGGCGGATCAGCCCCGCGCCCTGTAAAAAGGGACGGCCCGCCGAGGACCCTAAACTCTGT  
TTTTAGTGGAATTCTGAGTAAACAAACAAATAAATCAAACTTTCAACAACGGATCTCTTGTTCTGGC  
ATCGATGAAGAACGCAGCAAAATGCGATAAGTAATGTGAATTGCAGAATTCAGTGAATCATCGAATCTTTG  
AACGCACATTGCGCCCCGCCAGTATTCTGGCGGGCATGCCTGTTTCGAGCGTCATTTCACCCCTCAAGCTCAGC  
TTGGTGTGTTGGGACTCGCGGTAACCCGCGTTCCCCAAATCGATTGGCGGTCACGTCGAGCTTCCATAGCGTAG  
TAATCATACACCTCGTTACTGGTAATCGTCGCGGCCACGCCGTAAACCCCAACTTCTGAATGTTGACCTCG  
GATCAGGTAGGAATACCCGCTGAACCTTAAGCATATCATTAAGCGGGAGGAAA

BLAST query:

>Fusarium sp. isolate DSM100287\_DF16\_RLCS18 small subunit ribosomal RNA gene, partial sequence; internal transcribed spacer 1, 5.8S ribosomal RNA gene, and internal transcribed spacer 2, complete sequence; and large subunit ribosomal RNA gene, partial sequence

Sequence ID: MT453272.1 Length: 1136

Range 1: 30 to 585 Score:979 bits(530), Expect:0.0, Identities:549/557(99%), Gaps:5/557(0%), Strand: Plus/Plus

---



---

Strain: **S11**

Identified genus: *Fusarium*

ITS sequence:

GRWAYSSGRGTTTWMCTCCCAAACCCCTGTGAACATACCACTTGTTCCTTCGGCGGATCAGCCCCGCTCCCG  
GTAAAACGGGACGGCCCCGCCAGAGGACCCCTAAACTCTGTTTCTATATGTAACCTCTGAGTAAAACCATAA  
ATAAATCAAAACTTTCAACAACGGATCTCTTGGTTCTGGCATCGATGAAGAACGCAGCAAAATGCGATAA  
GTAATGTGAATTGCAGAATCAKTGAATCATCGAATCTTTGAACGCACATTGCGCCCCGCCAGTATTCTGGCG  
GGCATGCCTGTTCKAGCGTCATTTCAACCCTCAAGCACAGCTTTGTGTGGGATTTKATTTAATTCTTGTTC  
TYATATTGATTGGATTTTTATTTTATWAMMTAYAGTTAYASCAAACTTTTTTTACTTTTATYTTTTTCTTTTY  
TTCTTCTTTTAACTACTCCTRTWATWWTTTCTATTTTTTTTTTCA

BLAST query:

>*Fusarium oxysporum* f. sp. *lycopersici* strain FWC81 18S ribosomal RNA gene, partial sequence; internal transcribed spacer 1, 5.8S ribosomal RNA gene, and internal transcribed spacer 2, complete sequence; and 28S ribosomal RNA gene, partial sequence

Sequence ID: KC478641.1 Length: 561

Range 1: 55 to 410 Score:599 bits(324), Expect:5e-167, Identities:344/356(97%), Gaps:0/356(0%), Strand: Plus/Plus

---

Strain: **S12**

Identified genus: *Fusarium*

ITS sequence:

AWWTWACGTTTCGTTGGTGTACCAGCGGAGGGTACATTACCGAGTTTACAACCTCCCAAACCCCTGTGAACAT  
ACCTATACGTTGCCTCGGCGGATCAGCCCGCGCCCTGTAAAAAGGGACGGCCCGCCGAGGACCCTAAACT  
CTGTTTTTAGTGGAACCTTCTGAGTAAAACAAACAATAAATCAAAACTTTCAACAACGGATCTCTTGGTTC  
TGGCATCGATGAAGAACGCAGCAAAATGCGATAAGTAATGTGAATTGCAGAATTCAGTGAATCATCGAATC  
TTTGAACGCACATTGCGCCCCGCCAGTATTCTGGCGGGCATGCCTGTTTCGAGCGTCATTTCAACCCTCAAGCT  
CAGCTTGGTGTGGGACTCGCGGTAACCCGCGTTCCCCAAATCGATTGGCGGTACAGTCGAGCTTCCATAGC  
GTAGTAATCATACACCTCGTTACTGGTAATCGTCGCGGCCACGCCGTAAAACCCCAACTTCTGAATGTTGAC  
CTCGRATCAGGTAGGAAATACCCGCTGAACTTWAAGCATATCAATWAAGSSGGRAGGAA

BLAST query:

>*Fusarium equiseti* isolate Fequi20 18S ribosomal RNA gene, partial sequence; internal transcribed spacer 1, 5.8S ribosomal RNA gene, and internal transcribed spacer 2, complete sequence; and 28S ribosomal RNA gene, partial sequence

Sequence ID: KJ562376.1 Length: 558

Range 1: 14 to 558 Score:957 bits(518), Expect:0.0, Identities:540/551(98%), Gaps:6/551(1%), Strand: Plus/Plus

---

Strain: **S13**

Identified genus: *Penicillium*

ITS sequence:

AAGGGWMATTACCGAGCGAGATTCTCTGATTCAACCTCCCACCCGTGTTTATTGTACCTTGTTCCTTCGGCG  
GGCCCGCCTCACGGCCCGCGGGGGGCATCTGCCCCGGGCCCCGCGCCCGCCGAAGACACCTTGAACCTCTGT  
ATGAAAATTGCAGTCTGAGTCTAAATATAAATTATTTAAACTTTCAACAACGGATCTCTTGGTTCCGGCAT  
CGATGAAGAACGCAGCGAAATGCGATACGTAATGTGAATTGCAGAATTCAGTGAATCATCGAGTCTTTGAA  
CGCACATTGCGCCCCCTGGTATTCGGGGGGGCATGCCTGTCCGAGCGTCATTGCTGCCCTCAAGCCCCGCTT  
GTGTGTTGGGTCTCGTCCCCCTTCCCGGGGGGACGGGCCCGAAAGGCAGCGGCGGCACCGCGTCCGGTCCT  
CGAGCGTATGGGGCTTTGTACCCGCTCTGTAGGCCCGCGCGGCGCTTGCCGATCAACCAAAAACCTTT

BLAST query:

>*Penicillium fellutanum* strain CBS 118477 small subunit ribosomal RNA gene, partial sequence; internal transcribed spacer 1, 5.8S ribosomal RNA gene, and internal transcribed spacer 2, complete sequence; and large subunit ribosomal RNA gene, partial sequence

Sequence ID: MT309667.1 Length: 900

Range 1: 159 to 650

Score:891 bits(482), Expect:0.0, Identities:490/493(99%), Gaps:3/493(0%), Strand: Plus/Plus

---

---

Strain: **S14**

Identified genus: *Penicillium*

ITS sequence:

GRGGCAGTACGCAAGTGACCTGCGGAGGTACATTACCGAGTGAGGGCCCTCTGGGTCCAACCTCCCACCC  
GTGTTTATCGTACCTTGTGCTTCGGCGGGCCCGCTCACGGCCGCGGGGGGCTTCTGCCCTCTGGCCCGC  
GCCCCGCCGAAGACACCATTGAACGCTGTCTGAAGATTGCAGTCTGAGCAATTAGCTAAATAAGTTAAACT  
TTCAACAACGGATCTCTTGTTCCGGCATCGATGAAGAACGCAGCGAAATGCGATACGTAATGTGAATTGC  
AGAATTCAGTGAATCATCGAGTCTTTGAACGCACATTGCGCCCCCTGGTATTCCGGGGGGGCATGCCTGTCCG  
AGCGTCATTGCTGCCCTCAAGCACGGCTTGTGTGTTGGGCCTCCGTCTCTCTCCCGGGGGACGGGCCCCGAA  
AGGCAGCGGMGGCACCGCGTCCGGTCTCGAGCGTATGGGGCTTCGTCACCCGCTCTTGTAGGCCCGGMC  
GGCGCTTGMCRAMACATCAAATCTTTTTTCCRGGWTGACCTCGGATCARGWAAGGGATACCCCGCTTGAA  
CATTAAARCATATCMAAWAAAGCGAGARGGAAA

BLAST query:

>Penicillium philippinense strain CBS 623.72 small subunit ribosomal RNA gene, partial sequence; internal transcribed spacer 1, 5.8S ribosomal RNA gene, and internal transcribed spacer 2, complete sequence; and large subunit ribosomal RNA gene, partial sequence

Sequence ID: MH860600.1 Length: 833

Range 1: 103 to 680 Score:950 bits(514), Expect:0.0, Identities:562/588(96%), Gaps:11/588(1%), Strand: Plus/Plus

---

Strain: **S15**

Identified genus: *Fusarium*

ITS sequence:

AAACATTTCGTTGGTGACTAGCGGAGGGTACATTACCGAGTTTCACTCCCGRCCCCTGTGACTACCTAKACGTT  
GCCTCGGGGGRTCASCCCGCGCCCGTAMAAAGGGACGGCCCGCCGAGGACCCCTAAACTCTGTTTTTAG  
TGGAACCTCTGAGTAAACAAACAAATAAATCAAACTTTCAACAACGGATCTCTTGTTCTGGCATCGAT  
GAARAACGCAGCAAAATGCGATAAGTAATGTGAATTGCARAATTCAGTGAATCATCGAATCTTTGAACGCA  
CATTGCGCCCGCCAGTATTCTGGCGGGCATGCCTGTTGAGCGTCATTTCACCCTCAAGCTCAGCTTGGTG  
TTGGGACTCGCGGTAACCCGCGTTCCCCAAATCGATTGGCGGTCACGTCGAGCTTCCATAGCGTAGTAATCA  
TACACCTCGTTACTGGTAATCGTCGCGGCCACGCCGTAAACCCCAACTTCTGAATGTTGACCTCGGATCAG  
GTAGGAATACCCGCTGAAACTTAAGCATATCATTAAARGCGGGAGGAA

BLAST query:

>Fusarium sp. NRRL 45996 18S ribosomal RNA gene, partial sequence; internal transcribed spacer 1, 5.8S ribosomal RNA gene, and internal transcribed spacer 2, complete sequence; and 28S ribosomal RNA gene, partial sequence

Sequence ID: GQ505760.1 Length: 1130

Range 1: 16 to 558 Score:898 bits(486), Expect:0.0, Identities:525/546(96%), Gaps:7/546(1%), Strand: Plus/Plus

---

Strain: **S16**

Identified genus: *Fusarium*

ITS sequence:

AACAGTTCGTTAGTGACTAGCGGAGGTCTTACCGAGYGTGCKTTCCTCCCGAYCTCCTGCGCCCACCCCTGTTCCG  
TTGCCCCGGGGGYCTCCCCGCGCCCGYAMAARGGGACGGCCCGCCCGAKGACCCCTAAACTCTGTTTTT  
AGTGGAACCTCTGAGTAAACAAACAAATAAATCAAACTTTCAACWACGGATCTCTTGTTCTGGCATC  
GATGAARAACGRCGAWAAKGCATAAGTAATGTGAATTGCARAATTCAGTGAATCRKCGAATCTTTGAA  
CGCACATTGCGCCCGCCAGTWTCTGGCGGGCATGCCTGTTGAGCGTCATTTCRACCTCAAGCTCARCTT  
GGTGTGTTGGGACTCGCGGTAACCKCGTTCCCCRAATCGATTGSCGGTCACGTCGAGCTTCCATAGCGTAGTA  
ATCATACACCTCGTTACTGGTAATCGTCGCGGCCACGCCGTAAACCCCAACTTCTGAATGTTGACCTCGGA  
TCAGGTAGGAATACCCGCTGAACCTTAAGCATATCATTAAAGCGGAGGAA

BLAST query:

>Fusarium sp. strain RS-2 internal transcribed spacer 1, partial sequence; 5.8S ribosomal RNA gene and internal transcribed spacer 2, complete sequence; and large subunit ribosomal RNA gene, partial sequence

Sequence ID: MT150615.1 Length: 528

Range 1: 30 to 513 Score:771 bits(417), Expect:0.0, Identities:455/484(94%), Gaps:0/484(0%), Strand: Plus/Plus

---

---

Strain: **S17**

Identified genus: *Penicillium*

ITS sequence:

TTKTTKACAATTTCGCAGTGACCTGCGGTAGGTACATTACCGAGCGAGAATTCTCTGATTCAACCTCCCACCC  
GTGTTTATTGTACCTTGTGCTTCGGCGGGCCCCGCTCACGGCCGCCGGGGGGGCATCTGCCCCGGGCCCCGC  
GCCCCGCCGAAGACACCTAGAACTCTGTATGAAAATTGCAGTCTGAGTCTAAATACAAATTATTTAAAACCTT  
CAACAACGGATCTCTTGGTTCCGGCATCGATGAAGAACGCAGCGAAATGCGATACGTAATGTGAATTGCAG  
AATTCAGTGAATCATCGAGTCTTTGAACGCACATTGCGCCCCCTGGTATTCCGGGGGGGCATGCCTGTCCGAG  
CGTCATTGCTGCCCTCAAGCCCGGCTTGTGTGTTGGGTCTCGTCCCCCTTCCCGGGGGGACGGGGCCCGAAA  
GGCAGCGGCGGCACCGCGTCCGGTCTCGAGCGTATGGGGCTTTGTACCCGCTCTGTAGGCCCGGGCCGGC  
GCTTGCCGATCAACCAAACTTTTTTCCAGGTTGACCTCGGAWCAAGGTAGGGATACCCGCTRAACTTAAG  
CATAATCAATAAAGCGGRAGGAAA

BLAST query:

>Penicillium sp. P10-15b internal transcribed spacer 1, partial sequence; 5.8S ribosomal RNA gene and internal transcribed spacer 2, complete sequence; and 28S ribosomal RNA gene, partial sequence

Sequence ID: KT354993.1 Length: 592

Range 1: 16 to 592 Score:1005 bits(544), Expect:0.0, Identities:568/580(98%), Gaps:4/580(0%), Strand: Plus/Plus

---

Strain: **S18**

Identified genus: *Penicillium*

ITS sequence:

TAWTWAWACARTCGTAGTGACCTGCGGAGGTACATTACCGAGCGAGAATTCTCTGATTCAACCTCCCACCC  
GTGTTTATTGTACCTTGTGCTTCGGCGGGCCCCGCTCACGGCCGCCGGGGGGGCATCTGCCCCGGGCCCCGC  
GCCCCGCCGAAGACACCTTGAACCTCTGTATGAAAATTGCAGTCTGAGTCTAAATATAAATTATTTAAAACCTT  
CAACAACGGATCTCTTGGTTCCGGCATCGATGAAGAACGCAGCGAAATGCGATACGTAATGTGAATTGCAG  
AATTCAGTGAATCATCRAGTCTTTGAACGCACATTGCGCCCCCTGGTATTCCGGGGGGGCATGCCTGTCCGAG  
CGTCATTGCTGCCCTCAAGCCCGGCTTGTGTGTTGGGTCTCGWCCCMCTTCCCGGARAGGACRGGGMCCG  
AAAS

BLAST query:

>Penicillium sp. P10-16c internal transcribed spacer 1, partial sequence; 5.8S ribosomal RNA gene and internal transcribed spacer 2, complete sequence; and 28S ribosomal RNA gene, partial sequence

Sequence ID: KT354994.1 Length: 593

Range 1: 14 to 431 Score:715 bits(387), Expect:0.0, Identities:408/420(97%), Gaps:4/420(0%), Strand: Plus/Plus

---

Strain: **S19**

Identified genus: *Fusarium*

ITS sequence:

GRRWYWWKRRTTTYACTTRCAAACCCCTGTGAACATACCACTTGTTGCCTCGGCGGATCAGCCCGCTCCCG  
GTAAAACGGGACGGCCCCGCCAGAGGACCCCTAAACTCTGTTTCTATATGTAACCTCTGAGTAAAACCATAA  
ATAAATCAAACTTTCAACAACGGATCTCTTGGTTCTGGCATCGATGAAGAACGCAGCAAAATGCGATAA  
GTAATGTGAATTGCAGAAATCAGTGAATCATCGAATCTTTGAACGCACATTGCGCCCGCCAGTATTCTGGCG  
GGCATGCCTGTTCKAGCGTCATTTCACCCCTCAAGCACAKCTTGGTGTGGGACTCKCGTTAATTCKCGTTC  
CTCAAATTGAWTGGCGGTCACGTCKAGCTTCCATAGCGTAKTAGTAAAACCCCTCKTTACTGGTAATCGTCKC  
GGCCACRCCGTTAATCCCCAACTTCTGAATGTTGACCTCKGATCATGTAGGAATACCTGCTGAACCTTATKCAT  
ATCAATTAGCGGARGTAGTA

BLAST query:

>Fusarium oxysporum isolate Ginrarsnl\_1 small subunit ribosomal RNA gene, partial sequence; internal transcribed spacer 1, 5.8S ribosomal RNA gene, and internal transcribed spacer 2, complete sequence; and large subunit ribosomal RNA gene, partial sequence

Sequence ID: MN055701.1 Length: 578

Range 1: 74 to 574 Score:845 bits(457), Expect:0.0, Identities:482/501(96%), Gaps:0/501(0%), Strand: Plus/Plus

---

---

Strain: **S20**

Identified genus: *Penicillium*

ITS sequence:

ARGAGCAGTGCGCAGTGACCTGCGGAGGTACATTACCGAGCGAGAATTCTCTGATTCAACCTCCCACCCGTG  
TTTATTGTACCTTGTTGCTTCGGCGGGCCCCGCCCTACGGCCCGCGGGGGGCATCTGCCCCCGGGCCCCGCGCC  
CGCCGAAGACACCTTGAACCTCTGTATGAAAATTGCAGTCTGAGTCTAAATATAAATTATTTAAAACCTTTCAA  
CAACGGATCTCTTGTTCCGGCATCGATGAAGAACGCAGCGAAATGCGATACGTAATGTGAATTGCARAAT  
TCAGTGAATCATCGAGTCTTTGAACGCACATTGCGCCCCCTGGTATTCCGGGRGGMATGCCTGTCCGAGCGT  
CATTGCTGMCCTCAAGCCCGGCTTGTGTGTTGGGTCTCGTCCCCCTTCCACRGGAAARAACRGRMMCCCC  
AAA

BLAST query:

>Penicillium canescens strain HSP207 internal transcribed spacer 1, partial sequence; 5.8S ribosomal RNA gene and internal transcribed spacer 2, complete sequence; and large subunit ribosomal RNA gene, partial sequence

Sequence ID: MK543250.1 Length: 562

Range 1: 1 to 395 Score:697 bits(377), Expect:0.0, Identities:387/395(98%), Gaps:1/395(0%), Strand: Plus/Plus

---

Strain: **S21**

Identified genus: *Paraphoma*

ITS sequence:

TSSRRAAGGWMWTACCTTTTCATGCAGAAGAGTTGAGATGGTTGAGTATCTCGCCTCTCAATTCTCGCTGTAT  
TTTACCCTTGTTTTTCTCATACTATTATTTCCCTCGGCAGGCTCGCCTGCCGGGTGAAACAACCTTCAAACCTGT  
TTAATTTTCAATCAGCGTCTGAACAAATTAATAATTACAACCTTTCAACAACGGATCTCTTGGTTCTGGCATC  
GATGAAGAACGCAGCGAAATGCGATAAGTAGTGTGAATTGCAGAATTCAGTGAATCATCGAATCTTTGAAC  
GCACATTGCGCCCCCTTGGTATTCCATGGGGCATGCCTGTTTCGAGCGTCATTGTACCTTCAAGCTCTGCTTGG  
TGTTGGGTGTTTGTCTTGTCTAGTGGCGGGACTCGCCTCAAAGTAATTGGCAGCCAGTGTTTTGGTTTTG  
AAGCGCAGCACAAGTCGCGATTCAAGTCTATACGCTAGTTTCCACAAGTCTTTTATCACTTTTGACCTCGGAT  
CAGGGT

BLAST query:

>Paraphoma radicina genomic DNA sequence contains ITS1, 5.8S rRNA gene and ITS2, culture collection UTHSC:DI16-209

Sequence ID: LT796835.1 Length: 587

Range 1: 55 to 553 Score:915 bits(495), Expect:0.0, Identities:498/499(99%), Gaps:1/499(0%), Strand: Plus/Plus

---

Strain: **S22**

Identified genus: *Penicillium*

ITS sequence:

AAACARTACGTAAGTGACCTGCGGAGGTACATTACCGAGCGAGAATTCTCTGATTCAACCTCCCACCCGTGT  
TTATTGTACCTTGTTGCTTCGGYGGGYCCGCCTACGGCCGTCGGGGGKGCTGTCTCCGGTTCCKTGCCCGS  
CKAGACMCCTTGAACCTCTGTWTGAAAATTGCWKGCTGAGTCTAAMTATRAMTTATTTAAWACTTTCAWC  
MAMSGATCWCTTGGMTMCGGCTTSGATGAAGAACSCAKSRAAATGSSATACRWAAGTGAATTGCAGAAT  
WCAKKGAAWCATCRAGKCTTTGAACGCWCATTGCGCCCCCTGGTATTCCGGGGGGAATGCCTGTCCGAGC  
GTCRTTGMTGCCCTCATWRCCGGCTTAKGYTTTGAGGACTCGAACCCCAAWCCAGAAAA

BLAST query:

>Penicillium sp. P10-16c internal transcribed spacer 1, partial sequence; 5.8S ribosomal RNA gene and internal transcribed spacer 2, complete sequence; and 28S ribosomal RNA gene, partial sequence

Sequence ID: KT354994.1 Length: 593

Range 1: 14 to 387 Score:435 bits(235), Expect:1e-117, Identities:315/374(84%), Gaps:3/374(0%), Strand: Plus/Plus

---

---

Strain: **S23**

Identified genus: *Penicillium*

ITS sequence:

GRAAACARTGAGTAGTGACCTGCGGAGGTACATTACCGAGCGAGAATTCTCTGATTCAACCTCCCACCCGTG  
TTTATTGTACCTTGTTGCTTCGGCGGGCCCCGCCCTCACGGCCCGCGGGGGGCATCTGCCCCCGGGCCCCGCGCC  
CGCCGAAGACACCTTGAACCTCTGTATGAAAATTGCAGTCTGAGTCTAAATATAAATTATTTAAAACCTTTCAA  
CAACGGATCTCTTGTTCCGGCATCGATGAAGAACGCAGMGAAATGCGATACGTAATGTGAATTGCAGAAT  
TCAGTGAATCATCGAGTCTTTGAACGCACATTGCGCCCCCTGGTATTCCGGGGGGGCATGCCTGACCGAGCGT  
CATTGCTGCCCTCGAGCCCCGGCTTGAGAACAAAARGAATAAATSAAAAATTCCCGGGAGGAAAC

BLAST query:

>Penicillium sp. P10-16c internal transcribed spacer 1, partial sequence; 5.8S ribosomal RNA gene and internal transcribed spacer 2, complete sequence; and 28S ribosomal RNA gene, partial sequence

Sequence ID: KT354994.1 Length: 593

Range 1: 13 to 388 Score:656 bits(355), Expect:0.0, Identities:369/376(98%), Gaps:2/376(0%), Strand: Plus/Plus

---

Strain: **S24**

Identified genus: *Aspergillus*

calmodulin sequence:

CAYSRRRCYKKWAWWWGAAAWWTTTGTGTTGTMCGGTTTCGAAAACCTTGAAAGCCTCTCGGATTTCCTCC  
TCGGAGTCGGTGTCCTTCATCTTTCTGGCCATCATTGTGAGGAACCTCTGATATATTTTTTTTGAGTCAGTGATC  
TGCCCAATATCCTGTAAGCCTAGAGGTTGTATCGTGAGTATATACCTGGGAAATCAATGGTGCCGTTGTTGTC  
GGCGTCAACCTCGTTGATCATGTCCTGGAGTTCAGACTCGGAGGGGTTCTGCCCCGAGCGAGCGCATCACAG  
TGCCGAGTTCCTTGTTGGTAATCTGGCCTAATCGCATTACACATTATCTATACCAGGTTAATTGATGGTGCT  
AAATATTATGGGATAATCGAGGCTGAGCGTATGCWAWAACTTTGCCGGATTGGGTGGGTTGCACYTTTTAT  
CTCTTTACTTTTCCWGTTCATAGCTGATTTTGTATTWTTTTTTWTTTTTTTTATM

BLAST query:

>Aspergillus pseudodeflectus partial CaM gene for calmodulin, isolate CCF 4965

Sequence ID: LT558760.1 Length: 752

Range 1: 140 to 539 Score:671 bits(363), Expect:0.0, Identities:389/402(97%), Gaps:3/402(0%), Strand: Plus/Minus

---

Strain: **S25**

Identified genus: *Fusarium*

ITS sequence:

GAWYSRRGTWYYAMTTCCAAACCCCTTGTGACATACCTATAACGTTGCCTCGGCGGGCGCCCGTCTCCCCGTA  
AAACGGGAGCGGCCCGCCAGAGGAAAACCAAACTCTTGTTTTAGAAGTATCTTCTGAGTAACAAAAATAA  
TCAATTAAAACCTTCAACAACGGATCTCTTGTTCTGGCATCGATGAAGAACGCAGCGAAATGCGATAAGT  
AATGTGAATTGCAGAAATCAGTGAATCATCRAATCTTTGAACGCACATTGCGCCCCGCCAGTACTCTGGCGG  
GCATGCCTGTTTCGAGCGTCATTCAACCTCWAGCCCCATCGGTTTGGTTTTTTGTWTCATTTTMTAATATT  
AATTCCC

BLAST query:

>Fusarium sp. BDS-2017a strain CGMCC3.17370 18S ribosomal RNA gene, partial sequence; internal transcribed spacer 1, 5.8S ribosomal RNA gene, and internal transcribed spacer 2, complete sequence; and 28S ribosomal RNA gene, partial sequence

Sequence ID: KX790415.1 Length: 527

Range 1: 59 to 375 Score:562 bits(304), Expect:5e-156, Identities:313/318(98%), Gaps:2/318(0%), Strand: Plus/Plus

---

---

Strain: **S26**

Identified genus: *Penicillium*

ITS sequence:

TGGWGCAGTCGCAGTGACCTGCGGGAGGtaCatTACCGAGTGAGGGCCCTCTGGGTCCAACCTCCCACCCGT  
GTTTATCGTACCTTGTTGCTTCGGCGGGCCCCGCCTCACGGCCGCCGGGGGGCTTCTGCCCTCTGGCCCGCGC  
CCGCCGAAGACACCATTGAACGCTGTCTGAAGATTGCAGTCTGAGCAATTAGCTAAATAAGTTAAAACCTTT  
CAACAACGGATCTCTTGTTCCGGCATCGATGAAGAACGCAGCGAAATGCGATACGTAATGTGAATTGCAG  
AATTCAGTGAATCATCGAGTCTTTGAACGCACATTGCGCCCCCTGGTATTCCGGGGGGGCATGCCTGTCCGAG  
CGTCATTGCTGCCCTCAAGCACGGCTTGTGTGTTGGGCCTCCGTCCTCCTCCCGGGGGACGGGCCCCGAAAG  
GCAGCGGCGGCACCGCGTCCGGTCCTCGAGCGTATGGGGCTTCGTCACCCGCTCTTGTAGGCCCGGCCGCGC  
GCTTGCCGACACATCAATCTTTTTTCCAGGTTGACCTCGGATCAGGTAGGGATAACCCGCT

BLAST query:

>Penicillium sp. isolate AM038-P9T4R 18S ribosomal RNA gene, partial sequence; internal transcribed spacer 1,  
5.8S ribosomal RNA gene, and internal transcribed spacer 2, complete sequence; and 28S ribosomal RNA gene,  
partial sequence

Sequence ID: KT264414.1 Length: 581

Range 1: 10 to 557 Score:989 bits(535), Expect:0.0, Identities:544/548(99%), Gaps:1/548(0%), Strand: Plus/Plus

---
