# Supplementary material for: Volatile Organic Compounds (VOCs) of Endophytic Fungi Growing on Extracts of the Host, Horseradish (Armoracia rusticana)
Source: MDPI journal article supplement (doi:10.3390/metabo10110451), 2020-11-08
Supplement: s1 [file s1]

**Supplementary table 2.** Area under curve (AUC) of the identified compounds in the headspace of fungal isolates grown on horseradish extract, using different cultivation techniques.

Abbreviation: hs, high relative surface agar film (proposed technique); l, liquid; nf, agar.

| Strain                    | H1       | H1        | H1       | H1       | H1        | H1       |
|---------------------------|----------|-----------|----------|----------|-----------|----------|
| Medium format             | hs       | l         | nf       | hs       | l         | nf       |
| Day                       | 3        | 3         | 3        | 4        | 4         | 4        |
| acetone                   | 4202865  | 552942    | 1530881  | 6570502  | 2738860   | 3275885  |
| ACN                       | 1885693  | 3148245   | 3008135  | 2191987  | 3872182   | 5468480  |
| AITC                      | 0        | 0         | 0        | 321872   | 0         | 394428   |
| CS <sub>2</sub>           | 5150051  | 0         | 2238920  | 3438926  | 0         | 4124258  |
| ethyl acetate             | 21735721 | 223811660 | 64286664 | 16317071 | 196439810 | 54646789 |
| ethyl propionate          | 295745   | 0         | 385810   | 233220   | 0         | 0        |
| methyl acetate            | 0        | 1878800   | 0        | 0        | 1742895   | 0        |
| methyl formate            | 0        | 0         | 0        | 0        | 0         | 0        |
| methyl-1-butanol acetate  | 0        | 0         | 0        | 0        | 0         | 0        |
| methyl-1-butanol isomer 1 | 11022823 | 10240929  | 13480199 | 9854887  | 14790513  | 11603569 |
| methyl-1-butanol isomer 2 | 4412099  | 8072548   | 5262103  | 3852259  | 9298005   | 5128776  |
| methyl-1-propanol         | 14584496 | 16198003  | 20506366 | 14598790 | 17659924  | 21662212 |
| propyl acetate            | 0        | 0         | 0        | 0        | 0         | 0        |
| styrene                   | 8582260  | 19198299  | 7759870  | 658365   | 1362931   | 695401   |

| Strain                    | H12     | H12     | H12     | H12     | H12     | H12     |
|---------------------------|---------|---------|---------|---------|---------|---------|
| Medium format             | hs      | l       | nf      | hs      | l       | nf      |
| Day                       | 3       | 3       | 3       | 4       | 4       | 4       |
| acetone                   | 762373  | 1094639 | 1272257 | 157489  | 2648479 | 2476522 |
| ACN                       | 3639241 | 788222  | 2484930 | 5988333 | 226358  | 6495034 |
| AITC                      | 0       | 0       | 1966720 | 0       | 0       | 2947701 |
| CS <sub>2</sub>           | 2255956 | 0       | 3947120 | 2323653 | 0       | 8613367 |
| ethyl acetate             | 0       | 0       | 0       | 0       | 0       | 0       |
| ethyl propionate          | 0       | 0       | 0       | 0       | 0       | 0       |
| methyl acetate            | 0       | 0       | 0       | 0       | 0       | 0       |
| methyl formate            | 0       | 0       | 0       | 0       | 0       | 0       |
| methyl-1-butanol acetate  | 0       | 0       | 0       | 0       | 0       | 0       |
| methyl-1-butanol isomer 1 | 1363424 | 546807  | 1345376 | 1523985 | 805406  | 1165317 |
| methyl-1-butanol isomer 2 | 839223  | 582648  | 820072  | 390669  | 872264  | 610978  |
| methyl-1-propanol         | 0       | 0       | 0       | 0       | 0       | 0       |
| propyl acetate            | 0       | 0       | 0       | 0       | 0       | 0       |
| styrene                   | 0       | 0       | 0       | 0       | 0       | 0       |

| Strain                    | H6      | H6     | H6     | H6      | H6      | H6      |
|---------------------------|---------|--------|--------|---------|---------|---------|
| Medium format             | hs      | l      | nf     | hs      | l       | nf      |
| Day                       | 3       | 3      | 3      | 4       | 4       | 4       |
| acetone                   | 880100  | 0      | 748808 | 1746364 | 1109550 | 1930111 |
| ACN                       | 0       | 0      | 0      | 0       | 0       | 0       |
| AITC                      | 3576559 | 0      | 0      | 1931962 | 0       | 0       |
| CS <sub>2</sub>           | 0       | 0      | 0      | 0       | 0       | 0       |
| ethyl acetate             | 0       | 0      | 0      | 0       | 0       | 0       |
| ethyl propionate          | 0       | 0      | 0      | 0       | 0       | 0       |
| methyl acetate            | 0       | 0      | 0      | 0       | 0       | 0       |
| methyl formate            | 0       | 0      | 0      | 0       | 0       | 0       |
| methyl-1-butanol acetate  | 0       | 0      | 0      | 0       | 0       | 0       |
| methyl-1-butanol isomer 1 | 0       | 0      | 0      | 0       | 0       | 0       |
| methyl-1-butanol isomer 2 | 0       | 0      | 0      | 0       | 0       | 0       |
| methyl-1-propanol         | 0       | 0      | 0      | 0       | 0       | 0       |
| propyl acetate            | 0       | 0      | 0      | 0       | 0       | 0       |
| styrene                   | 0       | 728744 | 0      | 0       | 0       | 0       |

| Strain                    | S16      | S16       | S16       | S16     | S16       | S16       |
|---------------------------|----------|-----------|-----------|---------|-----------|-----------|
| Medium format             | hs       | l         | nf        | hs      | l         | nf        |
| Day                       | 3        | 3         | 3         | 4       | 4         | 4         |
| acetone                   | 0        | 1444965   | 1175321   | 369343  | 5686363   | 1420317   |
| ACN                       | 0        | 2351007   | 802703    | 0       | 3063334   | 5157357   |
| AITC                      | 0        | 306472    | 0         | 0       | 162357    | 0         |
| CS <sub>2</sub>           | 3360262  | 1471845   | 1429624   | 1794660 | 2265532   | 4334149   |
| ethyl acetate             | 12476638 | 730162014 | 133316303 | 0       | 709100742 | 113853998 |
| ethyl propionate          | 0        | 294946    | 0         | 0       | 0         | 0         |
| methyl acetate            | 0        | 4068663   | 1580298   | 0       | 3726227   | 1445773   |
| methyl formate            | 202856   | 624760    | 0         | 0       | 397816    | 0         |
| methyl-1-butanol acetate  | 0        | 0         | 0         | 0       | 0         | 0         |
| methyl-1-butanol isomer 1 | 422089   | 4102740   | 4961334   | 326919  | 4103062   | 4618100   |
| methyl-1-butanol isomer 2 | 0        | 2753780   | 3082155   | 0       | 3027924   | 1919232   |
| methyl-1-propanol         | 1801655  | 12431953  | 9475080   | 508936  | 13970974  | 9503573   |
| propyl acetate            | 0        | 2595488   | 752166    | 0       | 2434927   | 430642    |
| styrene                   | 0        | 0         | 0         | 0       | 0         | 0         |

| Strain                    | S2       | S2      | S2     | S2       | S2      | S2      |
|---------------------------|----------|---------|--------|----------|---------|---------|
| Medium format             | hs       | l       | nf     | hs       | l       | nf      |
| Day                       | 3        | 3       | 3      | 4        | 4       | 4       |
| acetone                   | 0        | 0       | 940226 | 787342   | 1199554 | 1882295 |
| ACN                       | 913781   | 496443  | 0      | 946442   | 1178278 | 0       |
| AITC                      | 88068964 | 0       | 0      | 19371219 | 699326  | 279082  |
| CS <sub>2</sub>           | 8617044  | 669101  | 0      | 5726052  | 1066883 | 0       |
| ethyl acetate             | 0        | 0       | 0      | 0        | 0       | 0       |
| ethyl propionate          | 0        | 0       | 0      | 0        | 0       | 0       |
| methyl acetate            | 0        | 0       | 0      | 0        | 0       | 0       |
| methyl formate            | 0        | 0       | 0      | 0        | 0       | 0       |
| methyl-1-butanol acetate  | 1393839  | 0       | 0      | 0        | 0       | 0       |
| methyl-1-butanol isomer 1 | 1378131  | 2392323 | 0      | 1122189  | 1934524 | 0       |
| methyl-1-butanol isomer 2 | 945123   | 1339629 | 0      | 757582   | 1340476 | 0       |
| methyl-1-propanol         | 721820   | 3083722 | 0      | 156953   | 2336930 | 0       |
| propyl acetate            | 0        | 0       | 0      | 0        | 0       | 0       |
| styrene                   | 0        | 0       | 0      | 0        | 0       | 0       |

| Strain                    | S25     | S25     | S25     | S25     | S25     | S25     |
|---------------------------|---------|---------|---------|---------|---------|---------|
| Medium format             | hs      | l       | nf      | hs      | l       | nf      |
| Day                       | 3       | 3       | 3       | 4       | 4       | 4       |
| acetone                   | 0       | 883408  | 0       | 1124436 | 3108065 | 1086028 |
| ACN                       | 1442541 | 1954617 | 2422201 | 4283734 | 2483826 | 2996431 |
| AITC                      | 332605  | 0       | 0       | 792812  | 0       | 714574  |
| CS <sub>2</sub>           | 1522220 | 0       | 1616398 | 3288127 | 897272  | 2311512 |
| ethyl acetate             | 0       | 0       | 0       | 0       | 0       | 0       |
| ethyl propionate          | 0       | 0       | 0       | 0       | 0       | 0       |
| methyl acetate            | 0       | 0       | 0       | 0       | 0       | 0       |
| methyl formate            | 0       | 0       | 0       | 0       | 0       | 0       |
| methyl-1-butanol acetate  | 0       | 0       | 0       | 0       | 0       | 0       |
| methyl-1-butanol isomer 1 | 0       | 0       | 552184  | 0       | 0       | 434650  |
| methyl-1-butanol isomer 2 | 0       | 0       | 0       | 0       | 0       | 0       |
| methyl-1-propanol         | 0       | 0       | 0       | 0       | 0       | 0       |
| propyl acetate            | 0       | 0       | 0       | 0       | 0       | 0       |
| styrene                   | 3617097 | 8131050 | 0       | 0       | 5264007 | 0       |

| Strain                    | S4      | S4      | S4      | S4      | S4      | S4      |
|---------------------------|---------|---------|---------|---------|---------|---------|
| Medium format             | hs      | l       | nf      | hs      | l       | nf      |
| Day                       | 3       | 3       | 3       | 4       | 4       | 4       |
| acetone                   | 1230451 | 1130905 | 1017116 | 1218793 | 2119399 | 1762362 |
| ACN                       | 0       | 0       | 0       | 581047  | 0       | 0       |
| AITC                      | 0       | 0       | 0       | 247053  | 300496  | 0       |
| CS <sub>2</sub>           | 0       | 0       | 0       | 0       | 0       | 0       |
| ethyl acetate             | 0       | 0       | 0       | 0       | 0       | 0       |
| ethyl propionate          | 0       | 0       | 0       | 0       | 0       | 0       |
| methyl acetate            | 0       | 0       | 0       | 0       | 0       | 0       |
| methyl formate            | 0       | 0       | 0       | 0       | 0       | 0       |
| methyl-1-butanol acetate  | 0       | 0       | 0       | 0       | 0       | 0       |
| methyl-1-butanol isomer 1 | 663954  | 1917959 | 0       | 502362  | 1954341 | 0       |
| methyl-1-butanol isomer 2 | 0       | 1011494 | 0       | 0       | 994208  | 0       |
| methyl-1-propanol         | 797758  | 3220912 | 0       | 716098  | 3150803 | 0       |
| propyl acetate            | 0       | 0       | 0       | 0       | 0       | 0       |
| styrene                   | 0       | 0       | 0       | 0       | 0       | 0       |
